# Supplementary material for: DUX4 promotes transcription of FRG2 by directly activating its promoter in facioscapulohumeral muscular dystrophy
Source: PubMed Central journal article supplement (PMC4364343; doi:10.1186/2044-5040-4-19), 2014-10-24
Supplement: 2044-5040-4-19-S1.pdf [file 2044-5040-4-19-S1.pdf]

| Group   | # | Gender | Age at biopsy | D4Z4 alleles (chromosome 4): | qRT-PCR | RNA-seq |
|---------|---|--------|---------------|------------------------------|---------|---------|
| Control | 1 | male   | 37            | 94kb 168B, 128kb 161A        | x       |         |
| Control | 2 | female | 44            | 28kb 163B, 65kb 161A         | x       |         |
| Control | 3 | male   | 58            | 47kb 161A, 74kb 168B         | x       |         |
| Control | 4 | male   | 65            | 85kb 168B, 166kb 163B        | x       |         |
| Control | 5 | male   | 29            | 47kb 161A, 72kb 168B         | x       |         |
| Control | 6 | male   | 62            | 47kb 161A, 72kb 168B         | x       |         |
| Control | 7 | male   | 40            | 65kb A161, 101kb B163        |         | x       |
| Control | 8 | female | 42            | 65 kb 163B, 250kb 161A       |         | x       |
| FSHD1   | 1 | female | 30            | 23kb 161A, 178kb 168B        | x       | x       |
| FSHD1   | 2 | female | 46            | 27kb 161A, 87kb 163B         | x       |         |
| FSHD1   | 3 | female | 47            | 19kb 161A, 47kb 163B         | x       |         |
| FSHD1   | 4 | female | 41            | 27kb 161A, 90kb 162B         | x       |         |
| FSHD1   | 5 | female | 60            | 26kb 161A, 82kb 168B         | x       |         |
| FSHD1   | 6 | male   | 33            | 28kb A161, 44kb H168A        | x       | x       |
| FSHD2   | 1 | male   | 44            | 43kb 161A, 132kb 163B        | x       |         |
| FSHD2   | 2 | male   | 36            | 44kb 161A, 63kb 161A         | x       |         |
| FSHD2   | 3 | male   | 59            | 50kb 161A, 58kb 163B         | x       |         |
| FSHD2   | 4 | female | 69            | 47kb 161A, 76kb 161A         | x       | x       |
| FSHD2   | 5 | male   | 42            | 90kb 161A, 131kb 166A        | x       |         |
| FSHD2   | 6 | male   | 26            | 54kb 161A, 220kb 161A        | x       |         |
| FSHD2   | 7 | male   | 34            | 54kb 161A, 70kb 161A         | x       |         |
| FSHD2   | 8 | female | 56            | 67kb 161A, 337kb 168B        | x       | x       |
| FSHD2   | 9 | male   | 28            | 65kb 161A, 160kb 161A        | x       |         |

**Additional table 1:** Characteristics of samples used for qRT-PCR and RNA-seq analysis. Length in kb and haplotype of both 4q D4Z4 alleles are indicated.
