# Supplementary material for: DUX4 promotes transcription of FRG2 by directly activating its promoter in facioscapulohumeral muscular dystrophy
Source: PubMed Central journal article supplement (PMC4364343; doi:10.1186/2044-5040-4-19), 2014-10-24

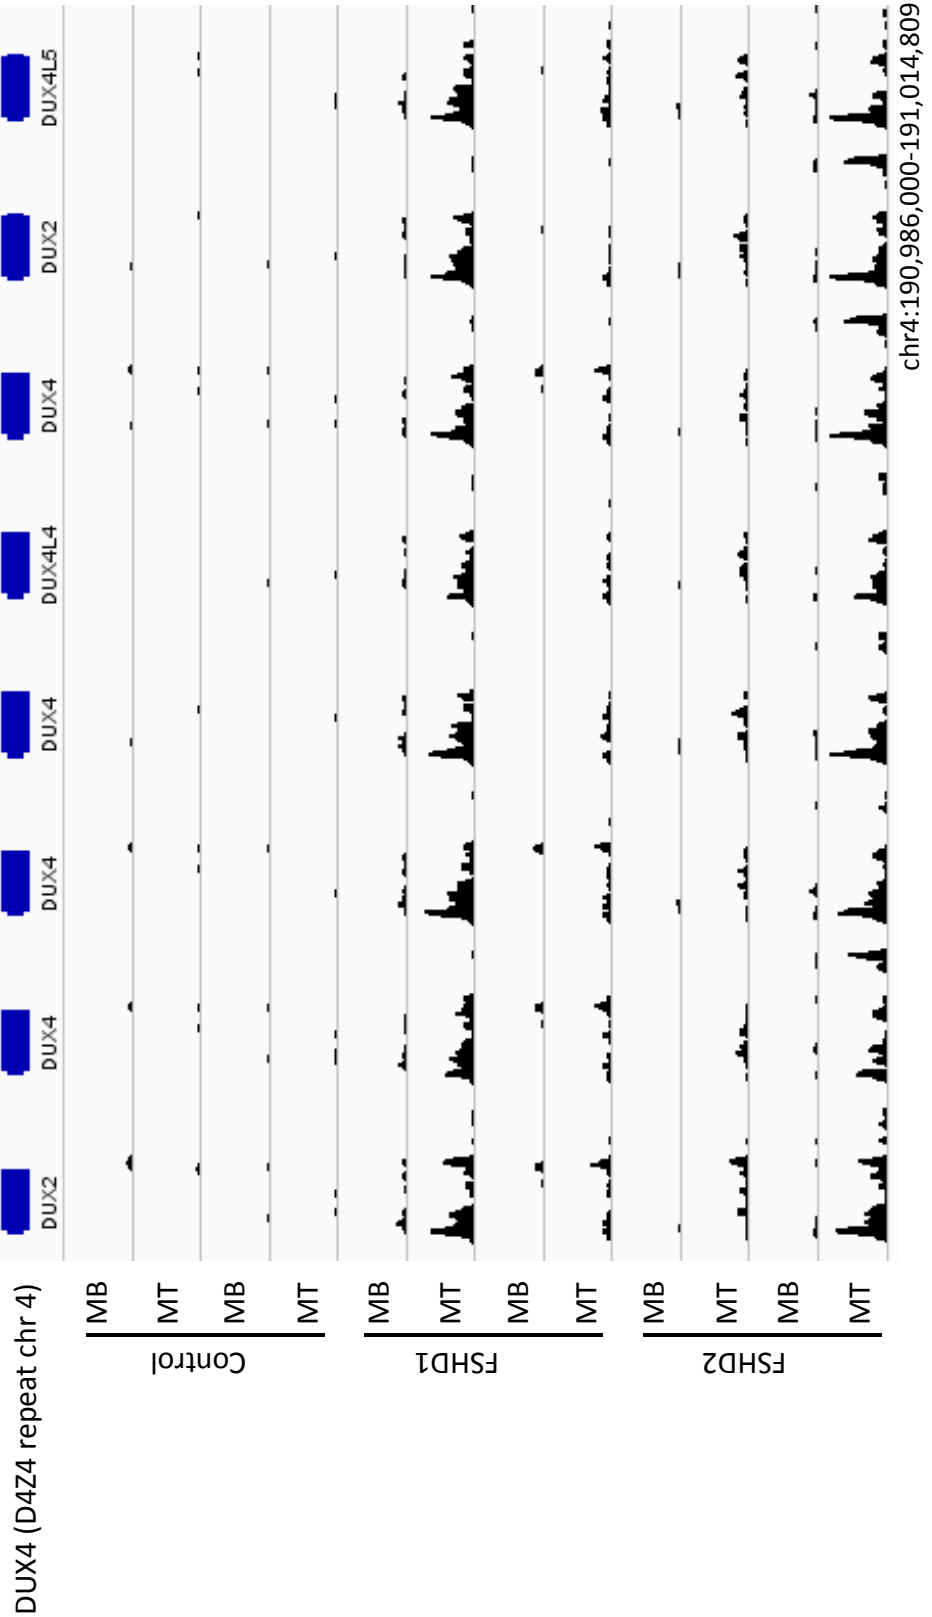

Supplement: 2044-5040-4-19-S2.pdf [file 2044-5040-4-19-S2.pdf]
